# Supplementary material for: Tailored Cigarette Warning Messages: How Individualized Loss Aversion and Delay Discounting Rates Can Influence Perceived Message Effectiveness
Source: MDPI journal article supplement (doi:10.3390/ijerph181910492), 2021-10-06
Supplement: s1 [file s1]

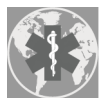

**Supplemental Table S1.** Ordinal Logistic Regression Results for Individual Items.

|                              | Discourage  |                 | Unpleasant  |             | Health Consequence |             |
|------------------------------|-------------|-----------------|-------------|-------------|--------------------|-------------|
|                              | AOR         | <i>p</i>        | AOR         | <i>p</i>    | AOR                | <i>p</i>    |
| <b>Message Type</b>          |             |                 |             |             |                    |             |
| Long-Term Message            | <b>1.47</b> | <b>.046</b>     | <b>1.75</b> | <b>.004</b> | <b>1.97</b>        | <b>.000</b> |
| Loss-Framed Message          | 1.12        | .570            | <b>0.62</b> | <b>.012</b> | 0.94               | .729        |
| <b>Individual Difference</b> |             |                 |             |             |                    |             |
| Age                          | 1.02        | .095            | 1.01        | .100        | <b>1.02</b>        | <b>.047</b> |
| Female                       | 0.88        | .533            | 0.78        | .223        | 0.98               | .940        |
| Married                      | 1.20        | .368            | 1.40        | .089        | <b>1.59</b>        | <b>.021</b> |
| White                        | 0.82        | .531            | 0.85        | .584        | 0.56               | .064        |
| College Education            | 1.01        | .944            | 1.06        | .752        | 0.92               | .674        |
| Income                       | 1.06        | .315            | 0.95        | .312        | 1.06               | .340        |
| Past Month Vaping            | 0.88        | .544            | 1.00        | .983        | 0.95               | .784        |
| Cigarettes/Day               | 0.98        | .112            | 1.00        | .890        | 0.99               | .488        |
| FTND                         | 1.08        | .155            | 1.00        | .989        | 1.01               | .806        |
| Perceived Quit Efficacy      | <b>1.62</b> | <b>&lt;.001</b> | 1.24        | .057        | <b>1.41</b>        | <b>.003</b> |
| Gain Discounting (Log)       | <b>0.56</b> | <b>&lt;.001</b> | <b>0.74</b> | <b>.020</b> | 0.98               | .906        |
| Loss Discounting (Log)       | 0.93        | .382            | 0.93        | .384        | 0.93               | .432        |
| Loss Aversion                | <b>0.92</b> | <b>.012</b>     | 0.96        | .190        | 0.96               | .150        |

Note. PME = perceived message effectiveness. **Bold** = statistically significant associations.
